# Supplementary material for: Olaparib Conjugates with Selenopheno[3,2-c]quinolinone Inhibit PARP1 and Reverse ABCB1-Related Multidrug Resistance
Source: MDPI journal article supplement (doi:10.3390/pharmaceutics14122571), 2022-11-23
Supplement: s1 [file s1]

**Olaparib conjugates with selenopheno[3,2-*c*]quinolinone inhibit  
PARP1 and reverse ABCB1-related multidrug resistance**

Marina Makrecka-Kuka, Jelena Vasiljeva, Pavels Dimitrijevs, Pavel Arsenyan\*

File S1: The copies of <sup>1</sup>H, <sup>13</sup>C, <sup>19</sup>F, <sup>77</sup>Se NMR, HRMS, and HPLC

# <sup>1</sup>H NMR of 5a

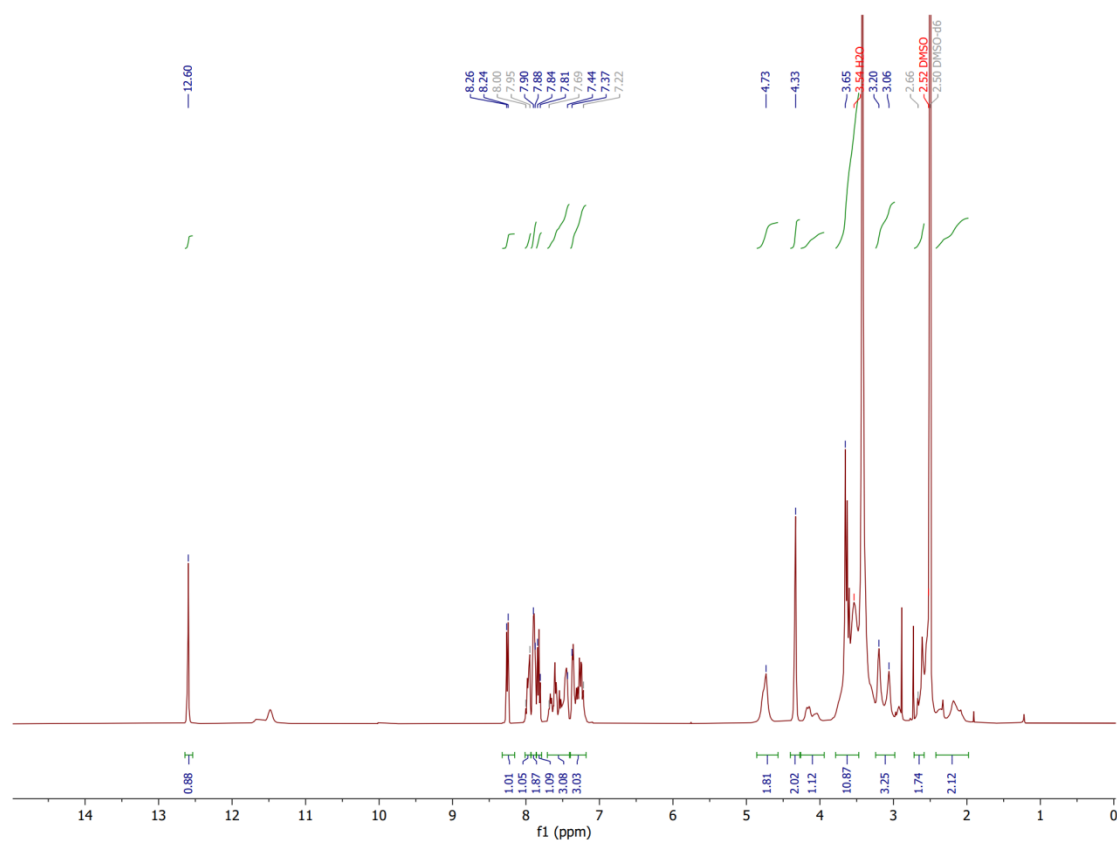

# <sup>13</sup>C NMR of 5a

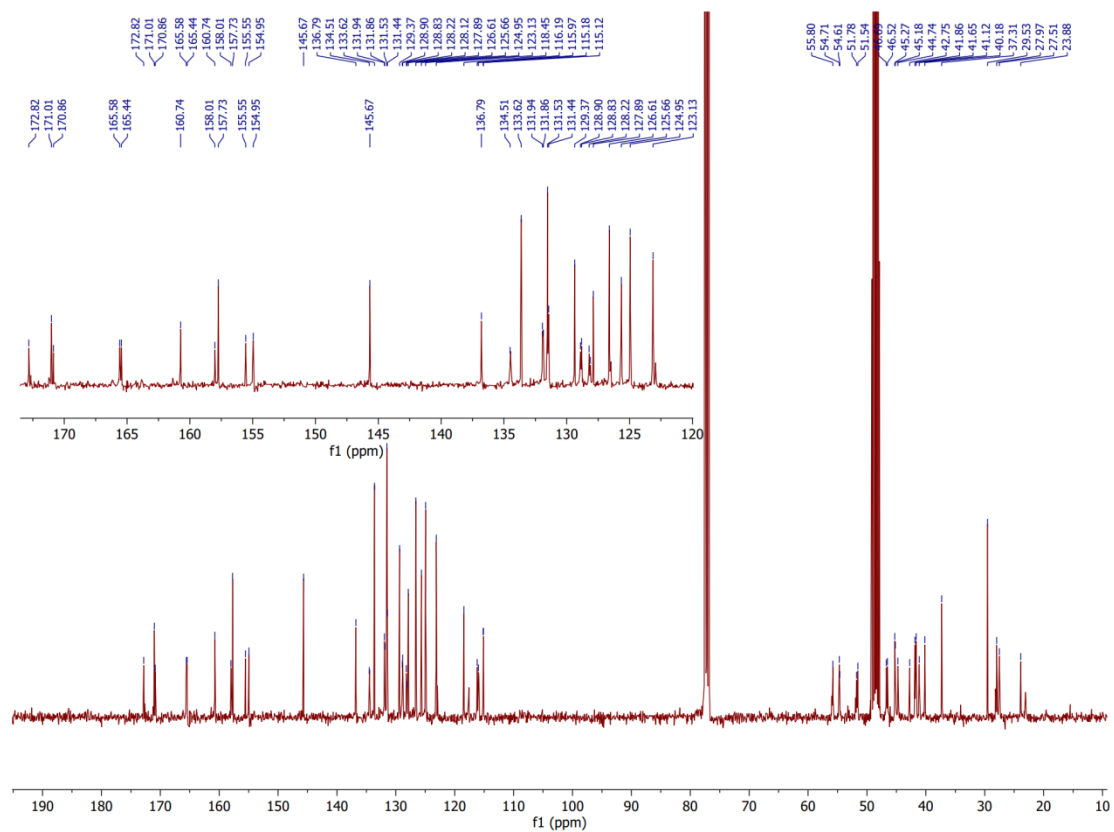

$^{19}\text{F}$  NMR of **5a**

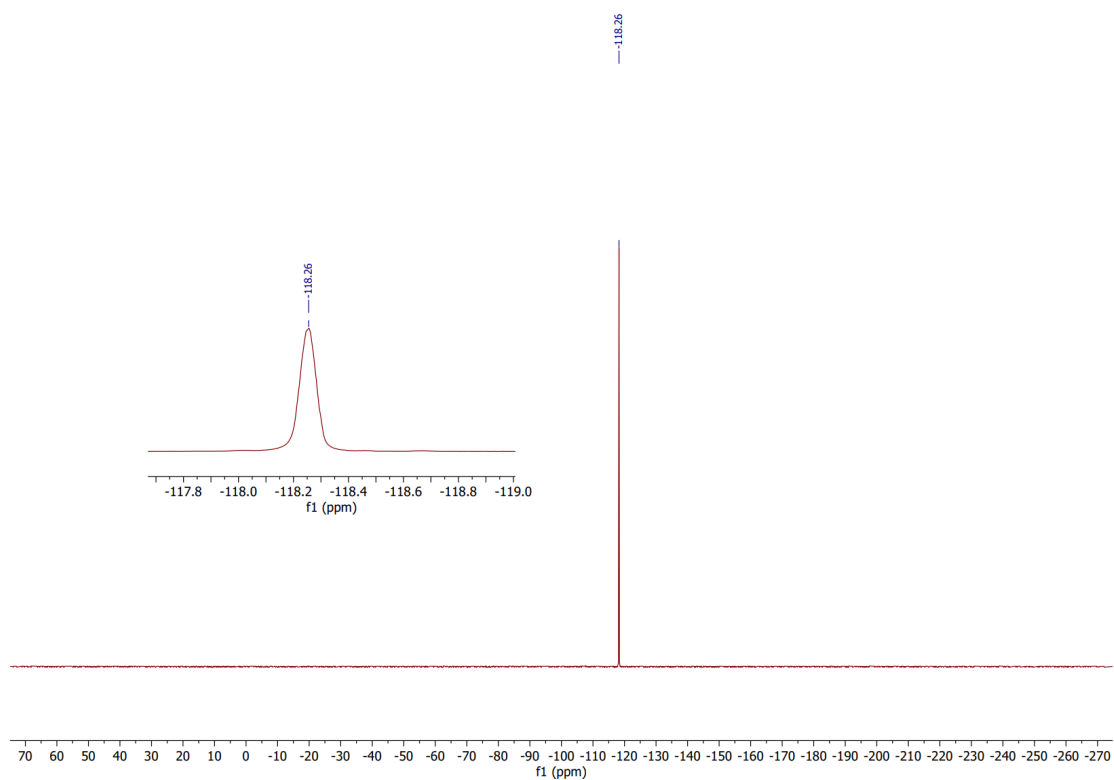

$^{77}\text{Se}$  NMR of **5a**

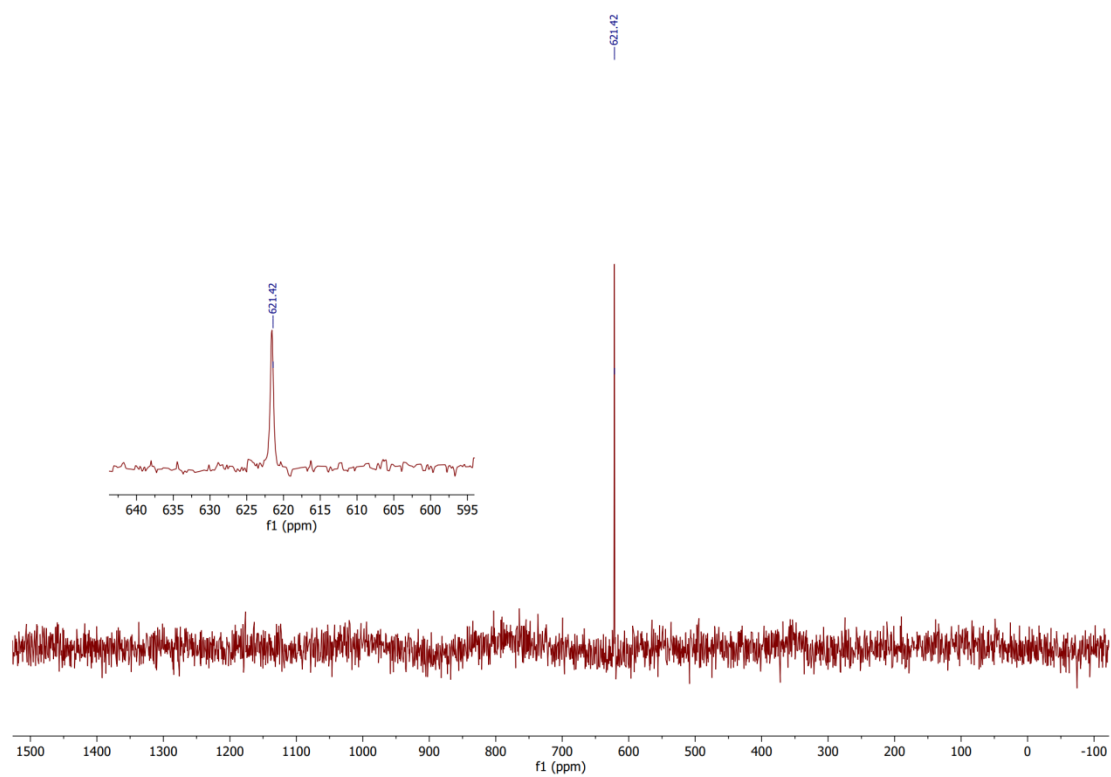

## HRMS of 5a

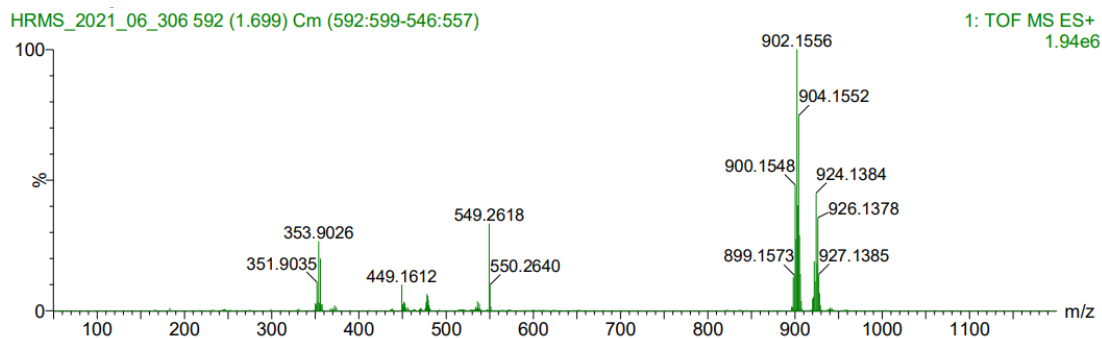

## HPLC of 5a

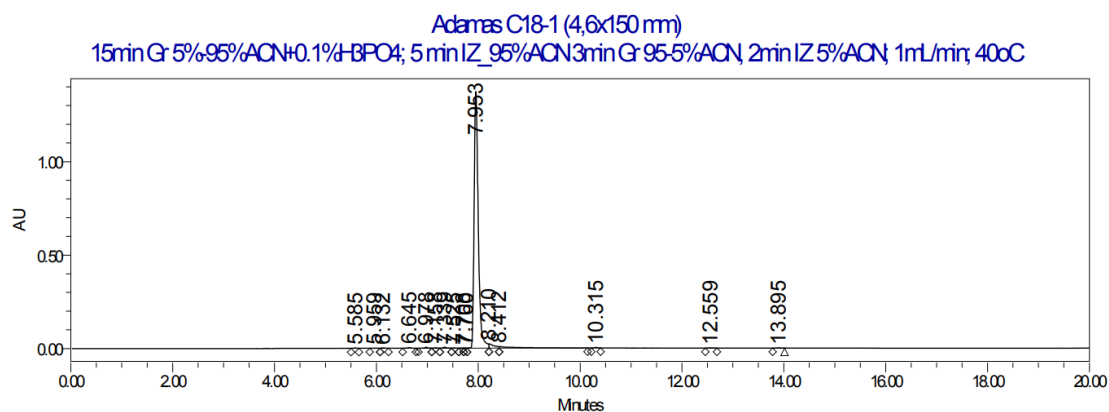

|     | RT     | Area      | %Area | Height  | EP Plate Count | Width@50% | Resolution | Selectivity |
|-----|--------|-----------|-------|---------|----------------|-----------|------------|-------------|
| 1   | 5.585  | 7645      | 0.09  | 2263    | 72675          | 0.0488    |            |             |
| 2   | 5.959  | 5206      | 0.06  | 637     | 13352          | 0.1214    | 2.592      | 1.092       |
| 3   | 6.132  | 8815      | 0.11  | 2254    | 70801          | 0.0542    | 1.161      | 1.039       |
| 4   | 6.645  | 16074     | 0.19  | 3017    | 41615          | 0.0767    | 4.626      | 1.111       |
| 5   | 6.978  | 23133     | 0.28  | 4624    | 63808          | 0.0650    | 2.773      | 1.065       |
| 6   | 7.158  | 11150     | 0.13  | 2062    | 39273          | 0.0850    | 1.420      | 1.033       |
| 7   | 7.339  | 28302     | 0.34  | 5024    | 62254          | 0.0692    | 1.381      | 1.032       |
| 8   | 7.525  | 7007      | 0.08  | 1065    |                |           |            | 1.032       |
| 9   | 7.708  | 5001      | 0.06  | 1127    |                |           |            | 1.030       |
| 10  | 7.760  | 5090      | 0.06  | 1440    |                |           |            | 1.008       |
| 11  | 7.953  | 7742595   | 93.66 | 1372844 | 51512          | 0.0825    |            | 1.031       |
| 12  | 8.210  | 166811    | 2.02  | 22060   |                |           |            | 1.040       |
| 13  | 8.412  | 217775    | 2.63  | 7869    |                |           |            | 1.030       |
| 14  | 10.315 | 12332     | 0.15  | 2412    | 94327          | 0.0790    |            | 1.275       |
| 15  | 12.559 | 5029      | 0.06  | 766     | 63722          | 0.1171    | 13.500     | 1.255       |
| 16  | 13.895 | 5168      | 0.06  | 929     | 152563         | 0.0837    | 7.850      | 1.121       |
| Sum |        | 8267131.9 |       |         |                |           |            |             |

# <sup>1</sup>H NMR of 5b

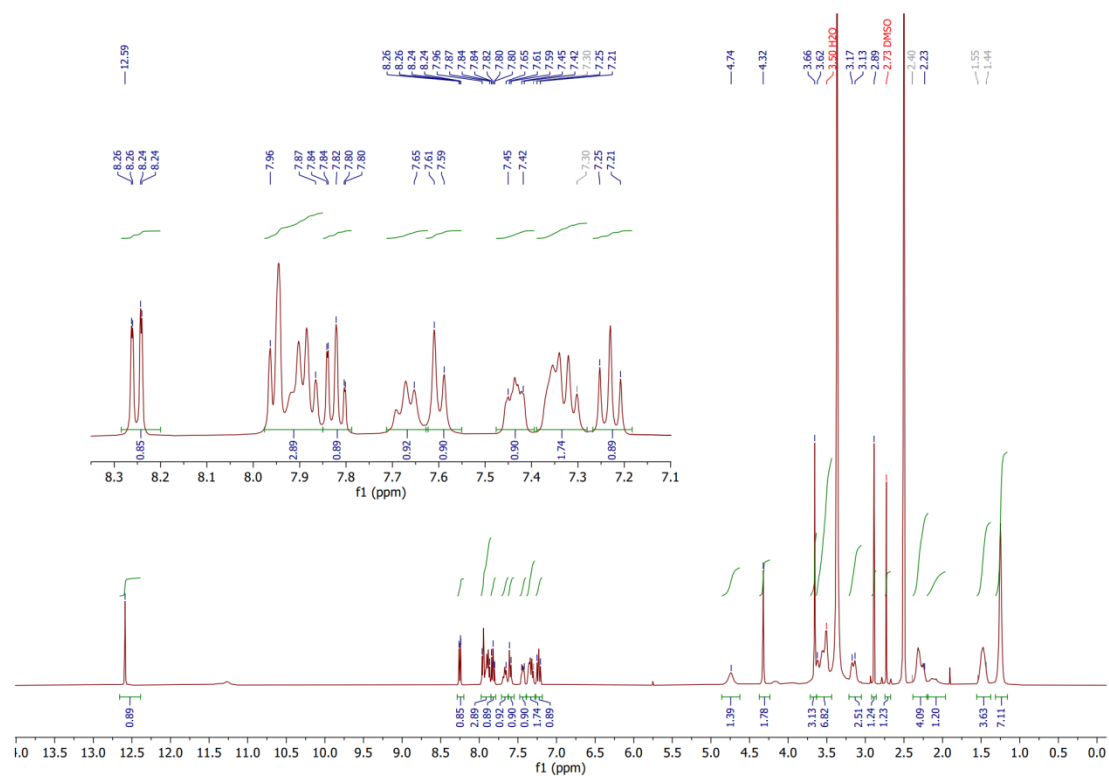

# <sup>13</sup>C NMR of 5b

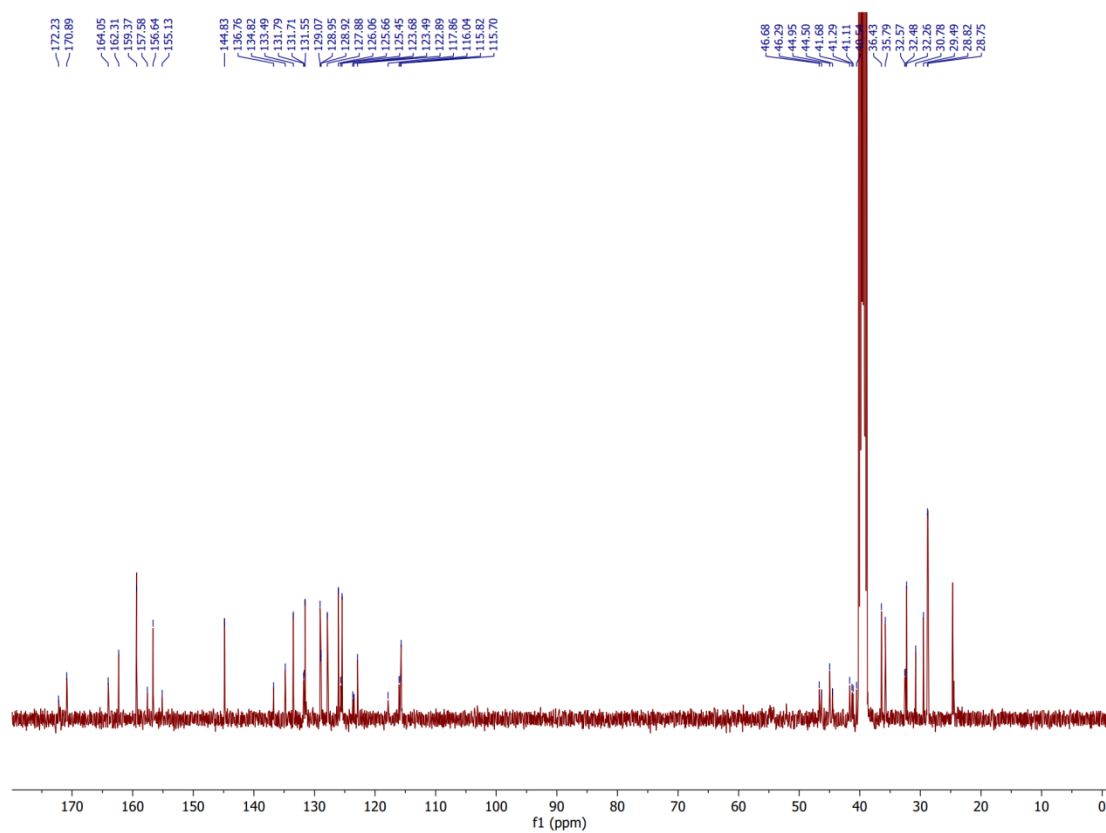

$^{19}\text{F}$  NMR of **5b**

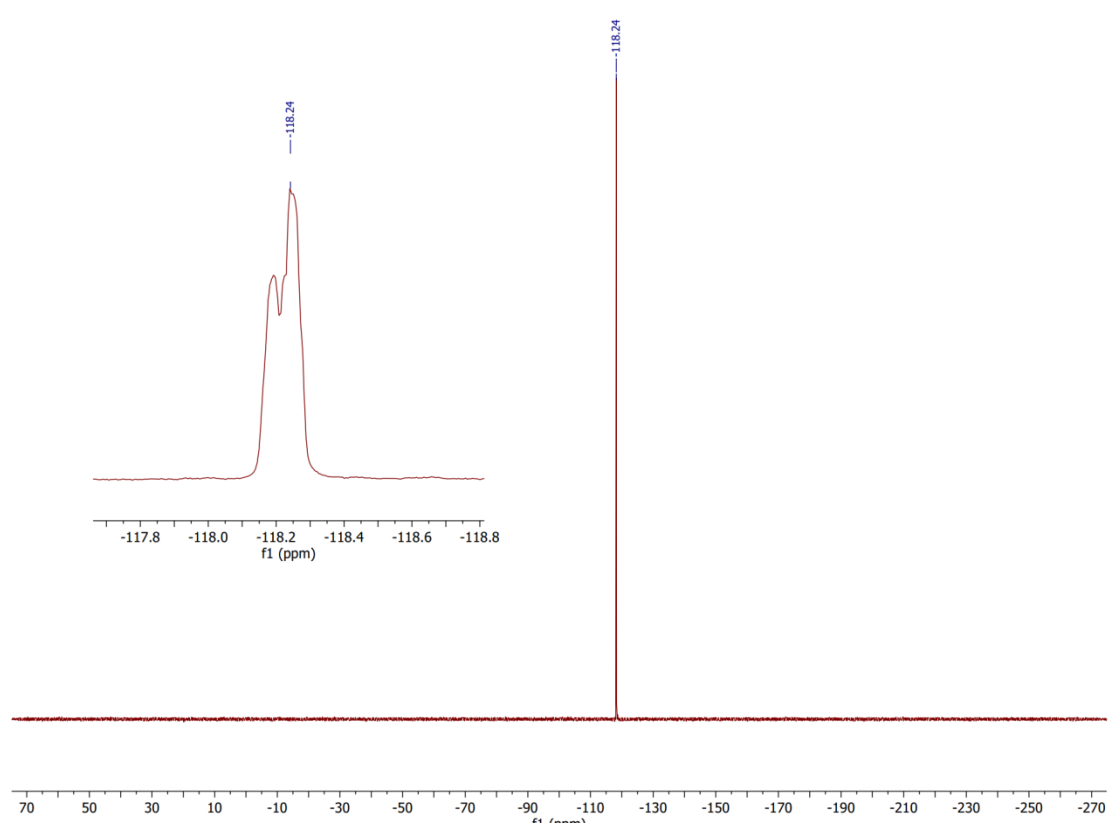

$^{77}\text{Se}$  NMR of **5b**

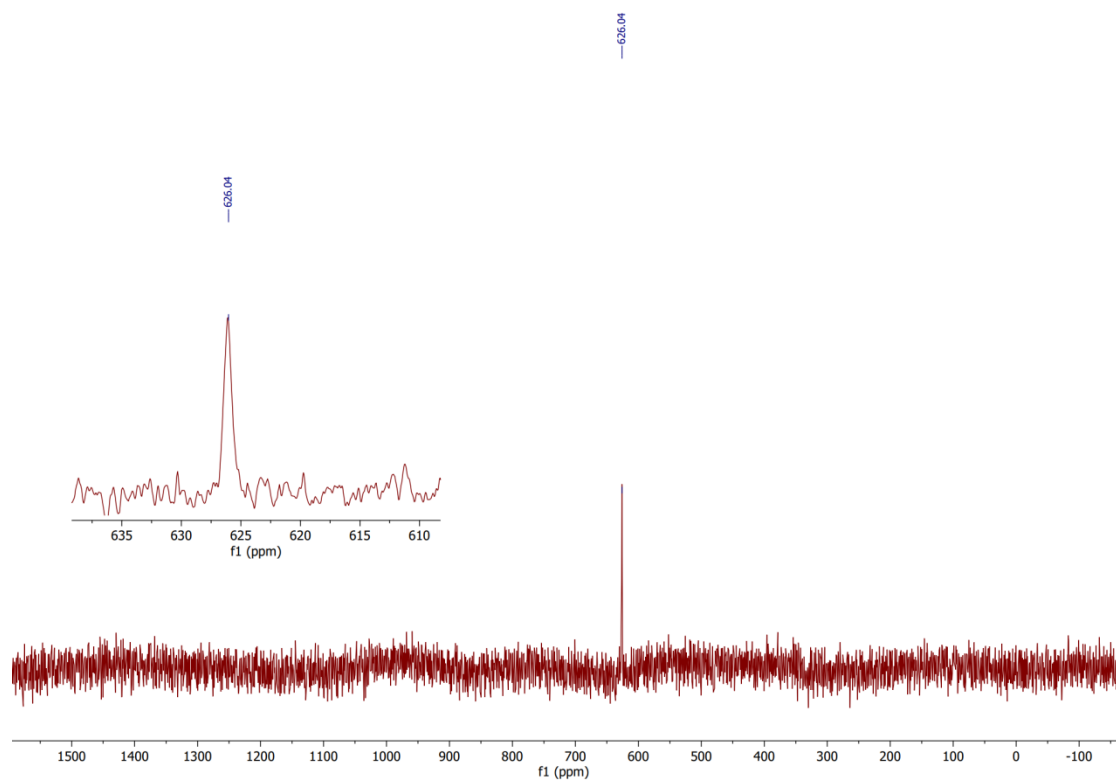

## HRMS of 5b

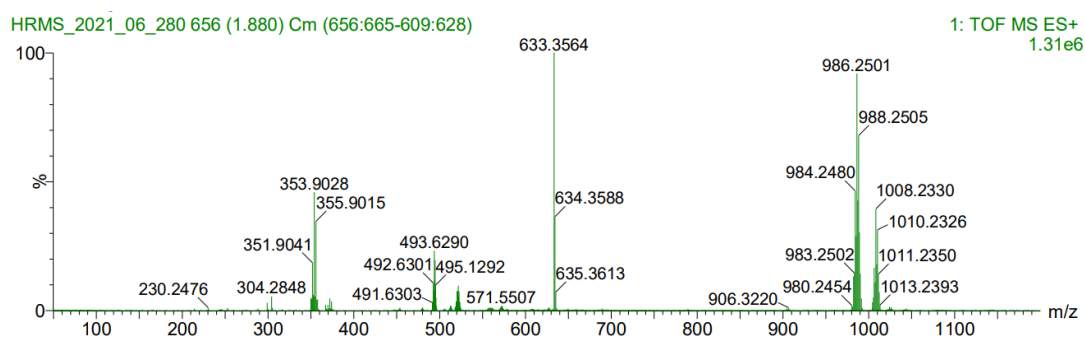

## HPLC of 5b

Apollo C18-12 5um (4.6x150 mm)  
 15 min Gr. 5-95%ACN + 0.1% H<sub>3</sub>PO<sub>4</sub>; 5 min Iz. 95%ACN; 2 min Gr. 95-5% ACN; 3 min Iz. 5% ACN.  
 F=1mL/min. T=40°C.

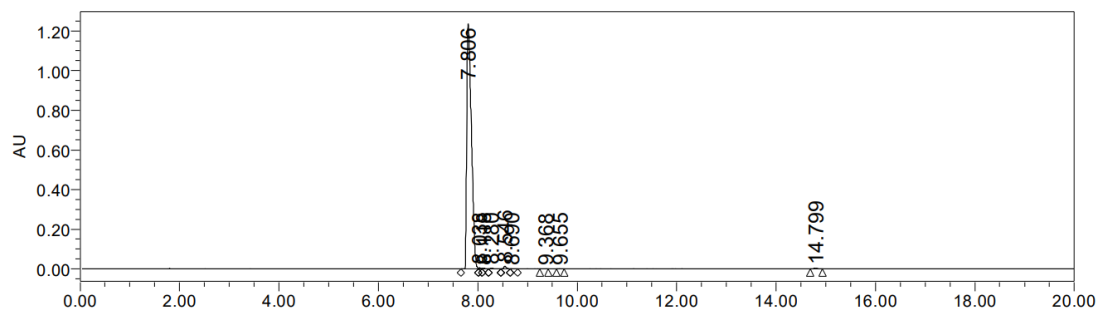

|   | RT     | Area    | % Area | Height  | EP Plate Count | Resolution | Selectivity | Width @ 50% |
|---|--------|---------|--------|---------|----------------|------------|-------------|-------------|
| 1 | 7.806  | 8022125 | 98.61  | 1235329 | 30257          |            |             | 0.106       |
| 2 | 8.038  | 15509   | 0.19   | 4798    |                |            | 1.04        |             |
| 3 | 8.118  | 8373    | 0.10   | 1868    |                |            | 1.01        |             |
| 4 | 8.280  | 15355   | 0.19   | 3527    | 147473         |            | 1.02        | 0.051       |
| 5 | 8.546  | 49465   | 0.61   | 13692   | 146210         | 3.04       | 1.04        | 0.053       |
| 6 | 8.690  | 3991    | 0.05   | 1013    | 114337         | 1.50       | 1.02        | 0.060       |
| 7 | 9.368  | 2188    | 0.03   | 440     | 76663          | 5.71       | 1.10        | 0.080       |
| 8 | 9.655  | 2673    | 0.03   | 793     | 192627         | 2.58       | 1.04        | 0.052       |
| 9 | 14.799 | 15632   | 0.19   | 3761    | 288834         | 52.06      | 1.64        | 0.065       |

# <sup>1</sup>H NMR of 5c

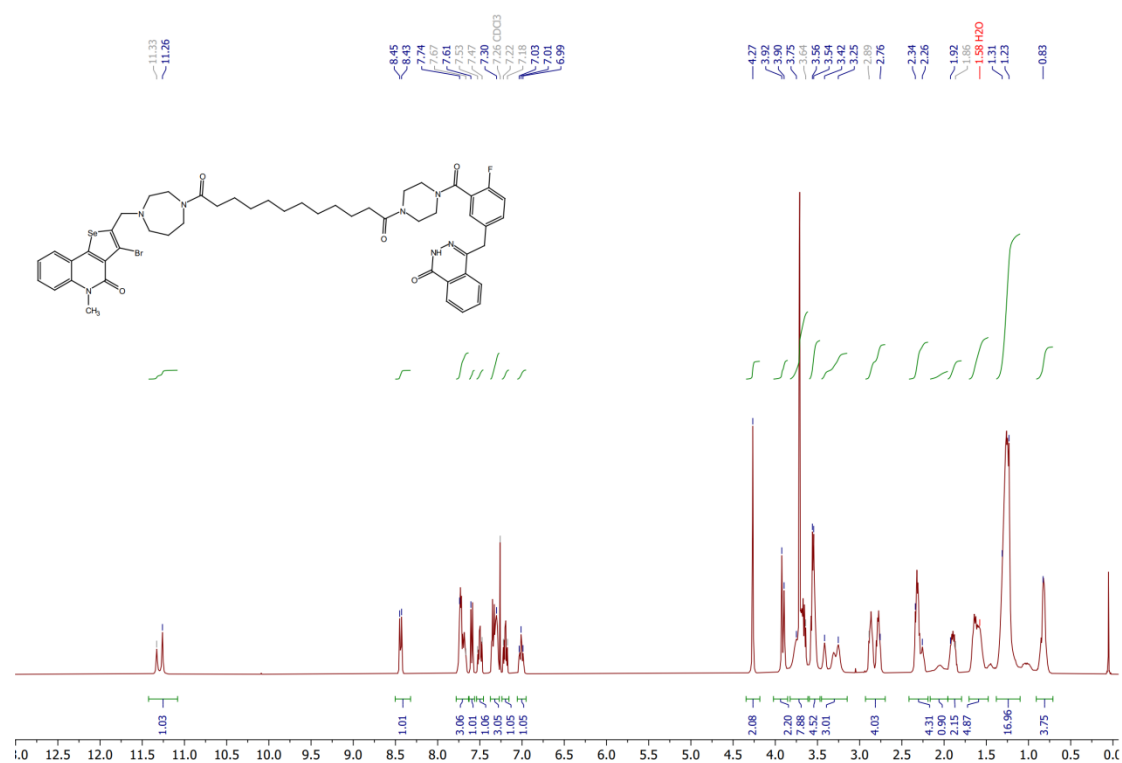

# <sup>13</sup>C NMR of 5c

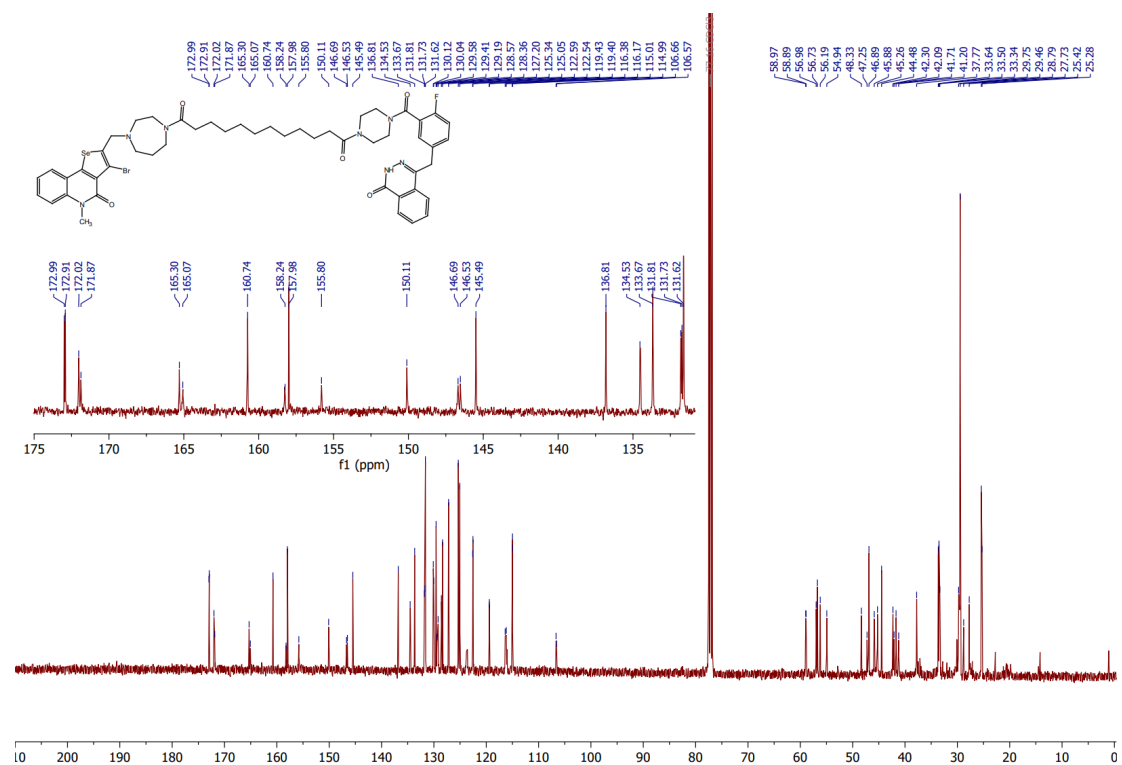



$^{19}\text{F}$  NMR of **5c**

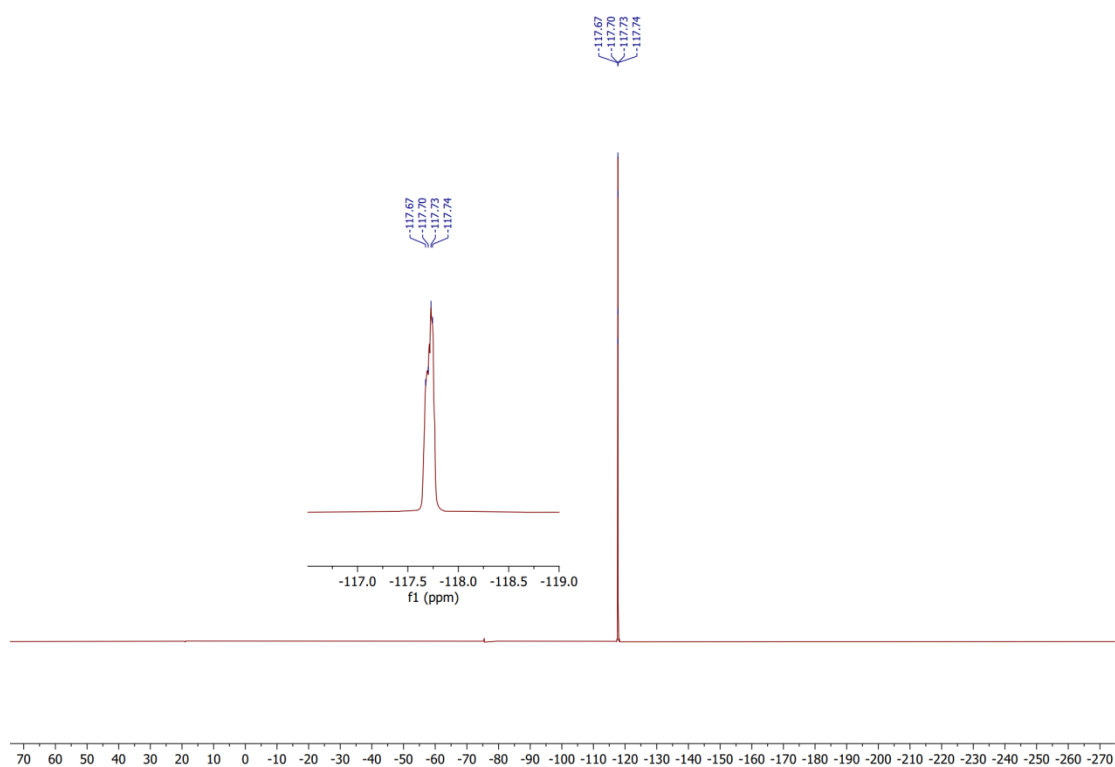

$^{77}\text{Se}$  NMR of **5c**

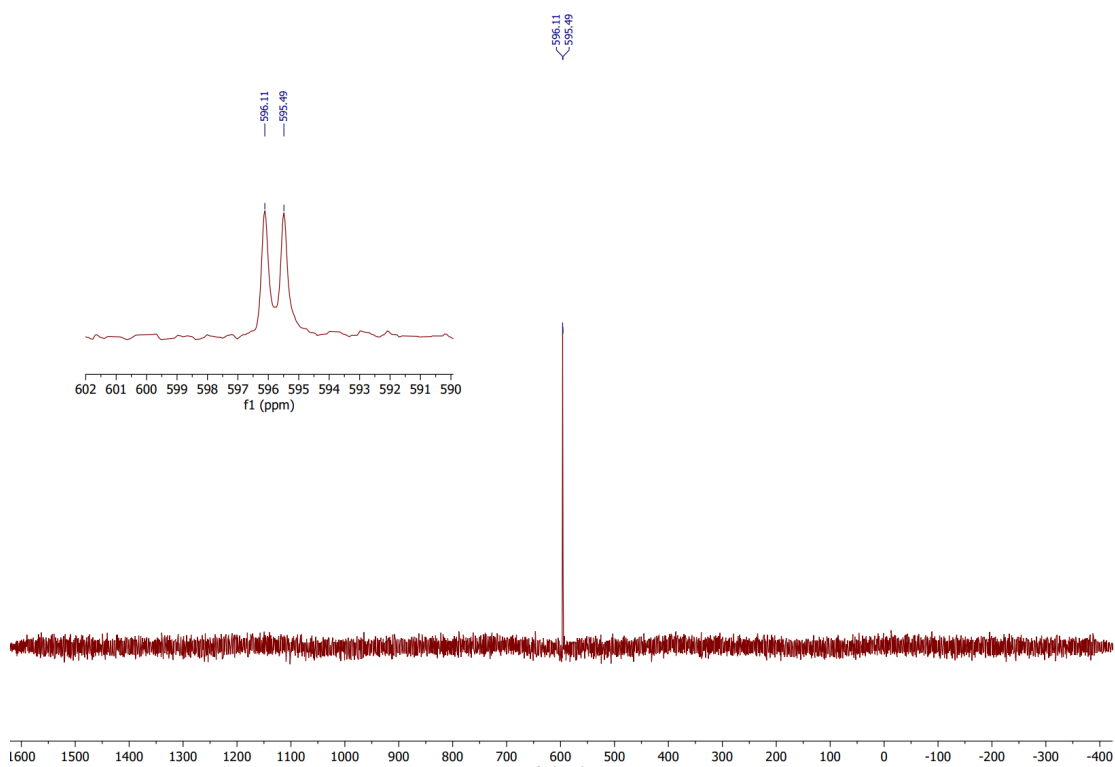

## HRMS of 5c

HRMS\_2021\_07\_276 718 (2.055) Cm (718:730-663:680)

1: TOF MS ES+  
2.19e6

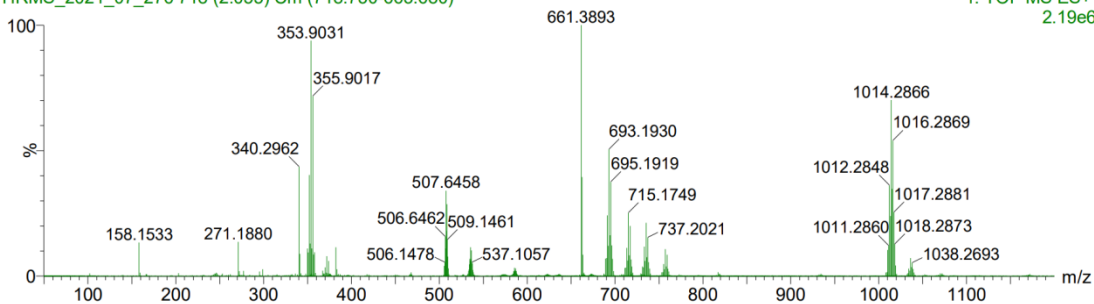

## HPLC of 5c

Apollo C18-12 5um (4.6x150 mm)

15min Gr 40-95%ACN + 0.1%H<sub>3</sub>PO<sub>4</sub>; 5min IZ 95%ACN; 2min Gr 95-40% ACN; 3min IZ 40%ACN.  
F=1mL/min. T=40oC.

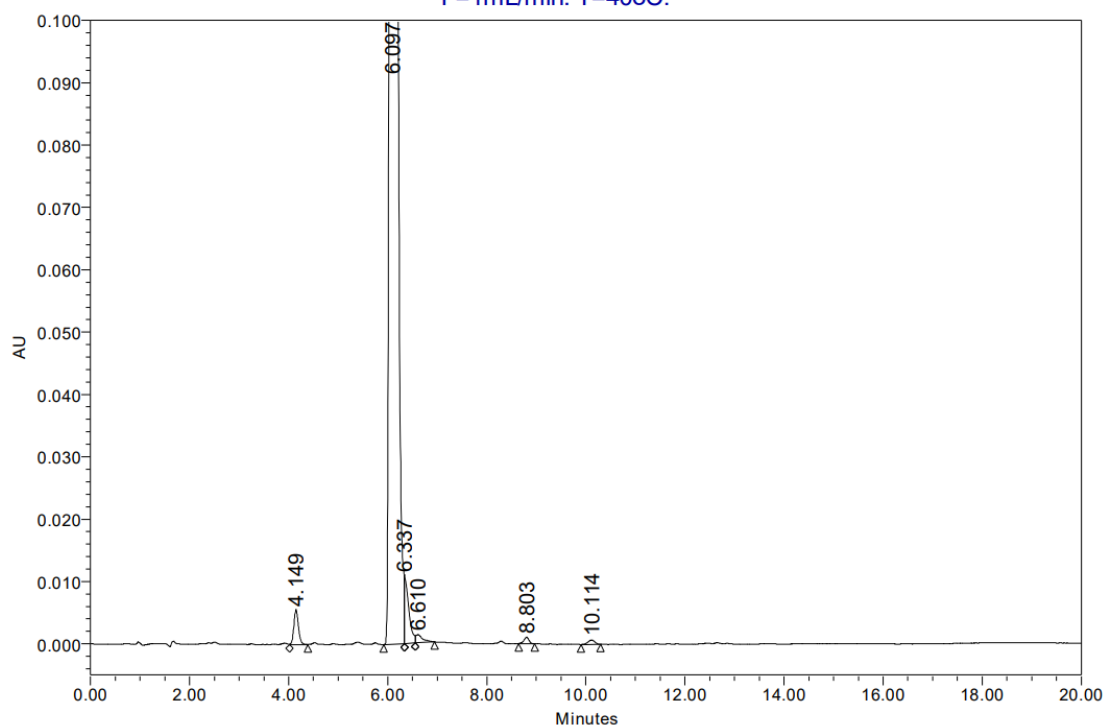

C=0,45mg/ml (40% ACN+0.1%PA)

|   | RT     | Area    | % Area | Height | EP Plate Count | Resolution | Selectivity | Width @ 50% |
|---|--------|---------|--------|--------|----------------|------------|-------------|-------------|
| 1 | 4.149  | 35792   | 0.72   | 5566   | 9942           |            |             | 0.098       |
| 2 | 6.097  | 4830626 | 97.40  | 637118 | 15057          | 10.70      | 1.75        | 0.117       |
| 3 | 6.337  | 66229   | 1.34   | 10952  |                |            | 1.05        |             |
| 4 | 6.610  | 13075   | 0.26   | 1298   |                |            | 1.06        |             |
| 5 | 8.803  | 7234    | 0.15   | 1041   | 38333          |            | 1.43        | 0.106       |
| 6 | 10.114 | 6793    | 0.14   | 696    | 23752          | 5.95       | 1.18        | 0.154       |
